# Supplementary material for: Multi-functionalization of woody biochar tuned for sustainable surface microbiological processes: a case study for energy applications
Source: Royal Society of Chemistry journal article supplement (doi:10.1039/d2se01701f), 2023-01-01
Supplement: d2se01701f1.pdf [file d2se01701f1.pdf]

## **Supporting Information**

### **Multifunctionalisation of Woody Biochar Tuned for Sustainable Surface Microbiological Processes: A Case Study for Energy Application.**

**Anjana Ratheesh<sup>1</sup>, Bhuvanendran Revamma Sreelekshmy<sup>1</sup>,**

**Sheik Muhammadhu Aboobakar Shibli<sup>\*2,3</sup>**

<sup>1</sup> *Department of Biotechnology, University of Kerala, Kariavattom Campus, Thiruvananthapuram, Kerala 695 581, India*

<sup>2</sup> *Department of Chemistry, University of Kerala, Kariavattom Campus, Thiruvananthapuram, Kerala 695 581, India*

<sup>3</sup> *Centre for Renewable Energy and Materials, University of Kerala, Kariavattom Campus, Thiruvananthapuram, Kerala 695 581, India*

#### **3.1. Selection of woody biochar and fixation of their specifications**

An appropriate selection of source of biomass and a pyrolysis temperature condition together determines the distinct physico-chemical characteristics of the biochar. Among different characteristics, surface functionalization plays an important role in bio-electrochemical features too. The present study started with the challenge of choosing the right biomass for biochar synthesis. Based on the hypothesis of higher surface area, porosity and applications, lead to the selection of highly porous biomasses such as water plants namely *Salvinia molesta*, *Azolla pinnata* and *Pistia stratiotes*. Preliminary evaluation of porosity revelations were favorable. Later on, developing these anodes, none gave stable coatings in spite of using different ratios for casting. The wettability of these biochar is high that the concentration of binder used must be higher to make a coating which is another disadvantage of the earlier selected biomasses. Considering the functional-rich characteristics, woody biomass of *Acacia auriculiformis* selected for the present study is strategically carbonized to increase its redox-active functionalities specific to bacterial interaction.

#### **3.2 Temperature controlled biochar synthesis**

Pyrolysis is widely preferred for production of biochar applied to bioelectrochemical systems, which specifically guarantees higher surface area and porosity. Conventional methods of Biochar production, their specificity and application are illustrated in Table S1.

**Table S1:** Conventional methods of Biochar production, their specificity and applications

| Source of biochar                                                     | Method of preparation        | Specificity                                                                                                                                             | Application                                                                | Reference            |
|-----------------------------------------------------------------------|------------------------------|---------------------------------------------------------------------------------------------------------------------------------------------------------|----------------------------------------------------------------------------|----------------------|
| Palm oil empty fruit bunch                                            | Microwave assisted synthesis | High yield, high surface area and porosity                                                                                                              | Substitute for activated carbon                                            | [1]                  |
| Pine cone                                                             | Slow pyrolysis               | Low yield, high surface area and porosity, sufficient bulk density                                                                                      | Removal of organic and inorganic pollutants                                | [2]                  |
| <i>Populus nigra</i> wood                                             | Steam assisted synthesis     | Micropore volume increased                                                                                                                              | CO <sub>2</sub> adsorption and separation                                  | [3]                  |
| Five seed shells namely pumpkin, walnut, coconut, pistachios, corncob | Gasification                 | The reactivity of each biochar is correlated with its ash level                                                                                         | Bioenergy with carbon capture and storage                                  | [4]                  |
| Shrimp Shell                                                          | High temperature pyrolysis   | At 750 °C, the biochar showed a solid graphitic structure hiking electrical conductivity.                                                               | Supercapacitor electrode                                                   | [5]                  |
| Rice husk                                                             | Hydrothermal carbonization   | Increased porosity and surface area, increased zeta potential, high yield                                                                               | Wastewater treatment and biofuel production                                | [6]                  |
| Algal biomass                                                         | Hydrothermal liquefaction    | Retains volatile organic materials and functional groups for adsorption, Higher energy denitrification ratio for high temperature biochar               | Crucial for biofuel production<br>Removal for dye and pollutant adsorption | [7]                  |
| Bamboo                                                                | Combustion                   | Less moisture content, less hydroxyl/hydrophilic groups retained due to destruction, high energy density                                                | Combustion systems                                                         | [8]                  |
| Oil palm waste                                                        | Torrefaction                 | Energy dense biochar, water resistivity, durability                                                                                                     | Biofuels                                                                   | [9]                  |
| <i>Acacia</i> wood                                                    | Torrefaction at 300°C        | Partial degradation of cellulosic components, Specific functionalised biochar synthesised acts as a perfect substrate for bio-electrochemical reactions | Bio-electrochemical applications                                           | <b>Present study</b> |

Pyrolysis at high temperatures or low temperatures where oxygen is restricted increases the porosity and surface area, but lacks conducive redox-active functionalized biochar suitable for enhanced bio-electrochemical reaction (Data not shown). Thus, strategic methodology of torrefaction at 300°C is adopted for the present study. Torrefaction at particular temperature results in condensation of disordered carbon in the presence of oxygen results in conducive biochar with redox-active functionalization capable for faster electron transfer for long distance is developed and thereby increases the bio-electrochemical characteristics of the biochar.

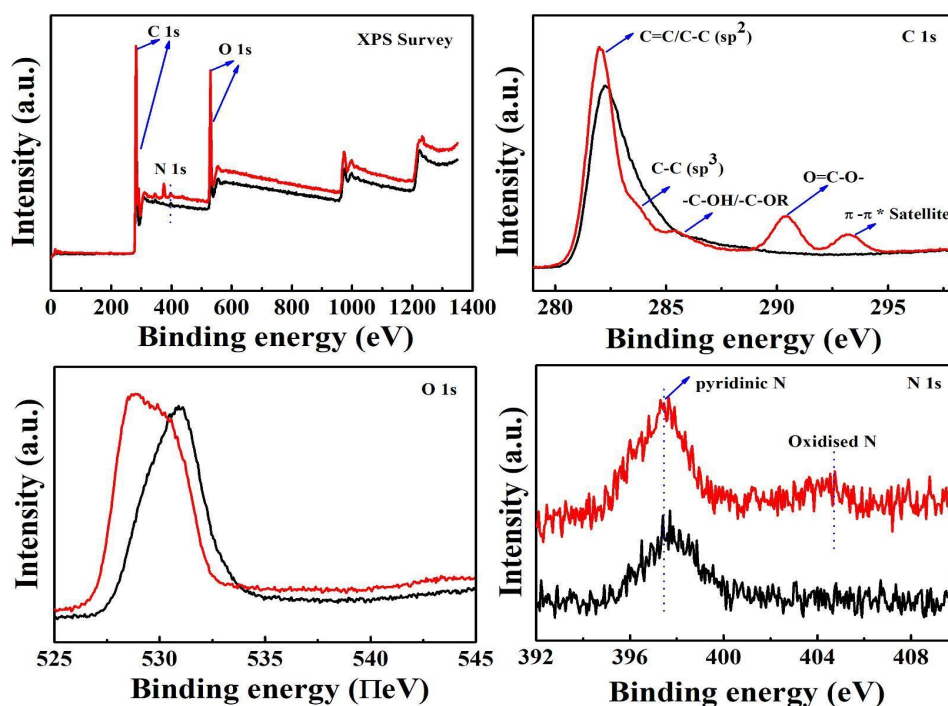

**Figure S1:** XPS spectra of (A) spectral survey, (B) C 1s, (C) O 1s, and (D) N 1s of BC (black) and CBC (red) showing its oxidation state and organic functionalization.

### 3.3. Methodology and strategies of anode preparation

#### 3.3.1 Choice of perfect binder for biochar-based anode

Binders helps to keep coatings intact on any surface. Binders range from polysaccharides, polymers to chemicals. **Table S2** shows the different binders that used in the present study and their impact on nature of coating produced. Polyvinyl alcohol (PVA) is chosen as the coating agent which produces coatings that are conducive, hydrophilic nontoxic, biodegradable and

economical.<sup>10,11</sup> Moreover, PVA doesn't interfere with any of the reaction altering electrode bacterial interaction.

### 3.3.2 Addictive picked to enhance coating conductance

Activated charcoal is used to add on to conductivity of a coating. No significant enhancement in conductance is observed, moreover the coating exhibits lesser stability and irregularity on the surface.

**Table S2:** Choice of binder and nature of coating

| Binder used     | Nature of coating                                                                     | Success/failure |
|-----------------|---------------------------------------------------------------------------------------|-----------------|
| PTFE            | Hydrophobic, increased resistance, long term stability                                | X               |
| PVDF            | Super hydrophobic coating, increased resistance                                       | X               |
| Nafion resin    | Not stable                                                                            | X               |
| Chitosan        | Washed out                                                                            | X               |
| Agar            | Washed out                                                                            | X               |
| Sodium Alginate | Washed out                                                                            | X               |
| Cellulose       | Washed out                                                                            | X               |
| Starch          | Washed out                                                                            | X               |
| PEI             | Hydrophilic, bulged & peels off                                                       | X               |
| PAN             | White cast formed as a result of immediate solidification after melting, not feasible | X               |
| PVA             | Good, hydrophilic coating, long term stability, increases ionic conductance           | ✓               |

### 3.3.3. Standardization of casting approach

PVA has dense pores which makes biochar and bacterial interaction less accessible. To resolve this issue, calcium carbonate is added which in turn increases the porosity.<sup>11</sup> It is noted that, in spite of standardization of the casting protocol, the same procedure is not applicable to other biochar powders. The concentration of binder, amount of biochar and addictive vary depending on the wetting of different char with binder which attributes to differential surface area and porous nature of biochar particles.

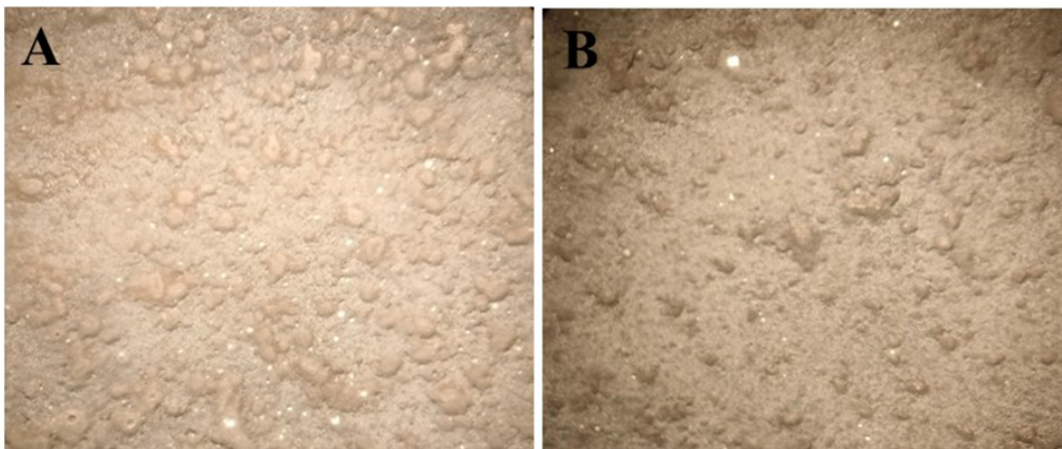

**Figure S2:** Optical images of (A) PVA/BC and (B) PVA/CBC coated electrodes

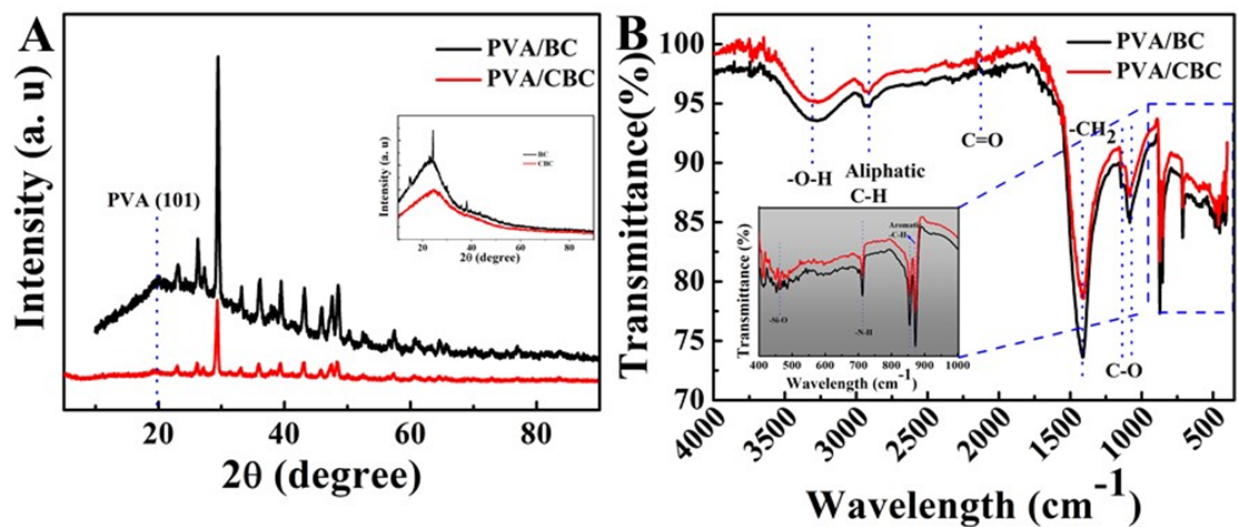

**Figure S3:** X-ray Diffraction analysis (A) and Fourier Transform Infrared spectra (B) of PVA/BC and PVA/CBC coated mild steel electrodes showing the retention of surface functional group with polymerization in PVA/BC, whereas amorphous carbon is transformed to crystalline with polymerization in PVA/CBC electrode.

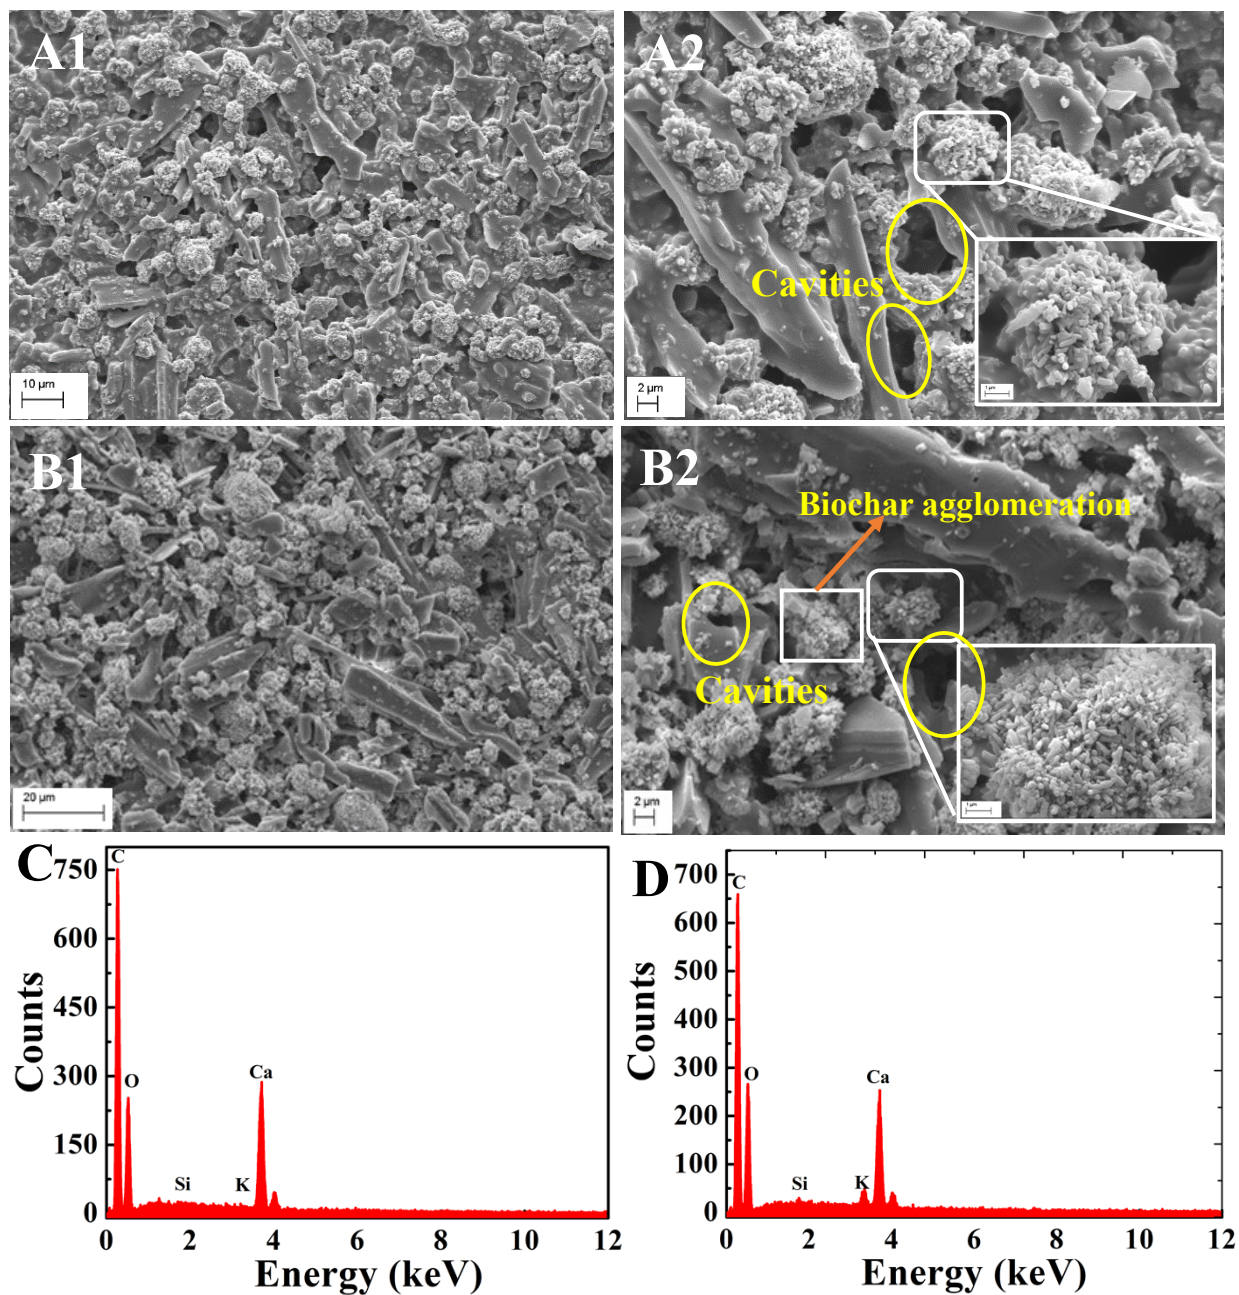

**Figure S4:** Morphological images of PVA/BC (A1 and A2) and PVA/CBC (B1 and B2) coated electrodes at different magnifications showing the compact arrangement of surface carbon and agglomeration of biochar with polymerization.

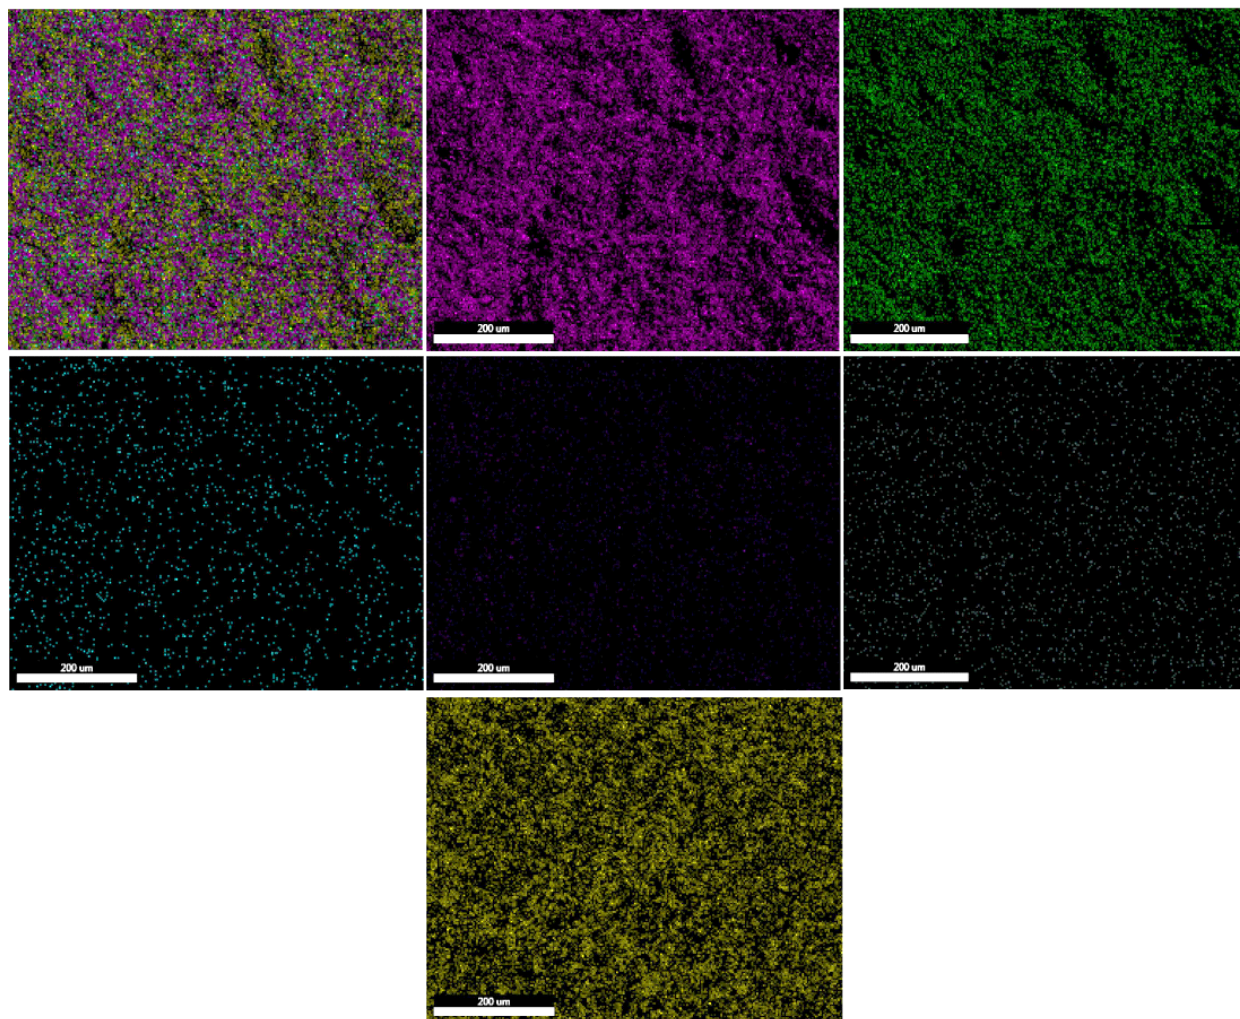

**Figure S5:** Elemental mapping revealing the distribution of (A) survey mapping, (B) C k, (C) O k, (D) N k, (E) Si k, (F) K k, and (G) Ca k on the surface of the PVA/BC electrode.

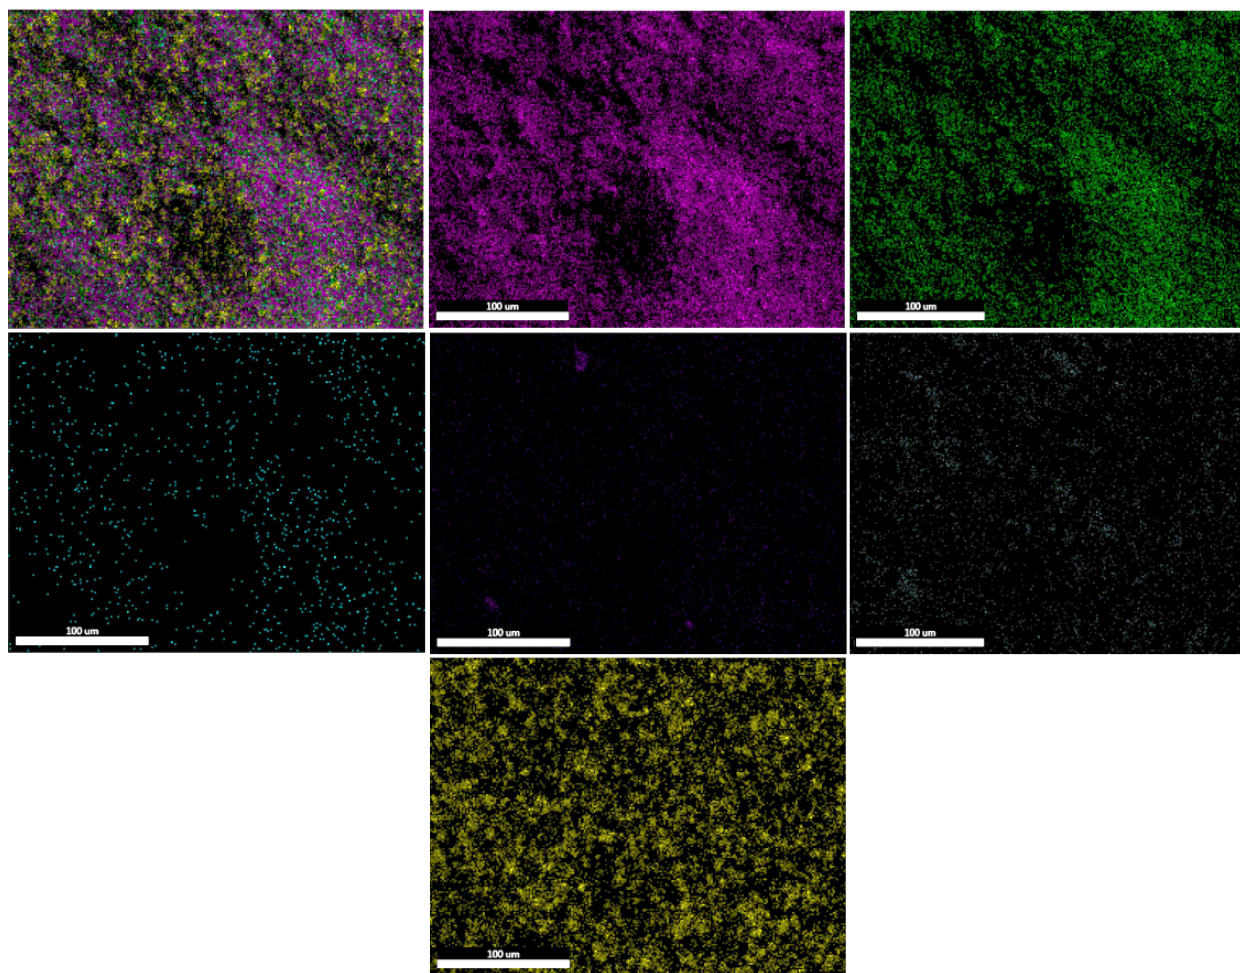

**Figure S6:** Elemental mapping revealing the distribution of (A) Survey mapping (B) C k, (C) O k, (D) N k, (E) Si k, (F) K k, and (G) Ca K on the surface of the PVA/CBC-1.0 electrode.

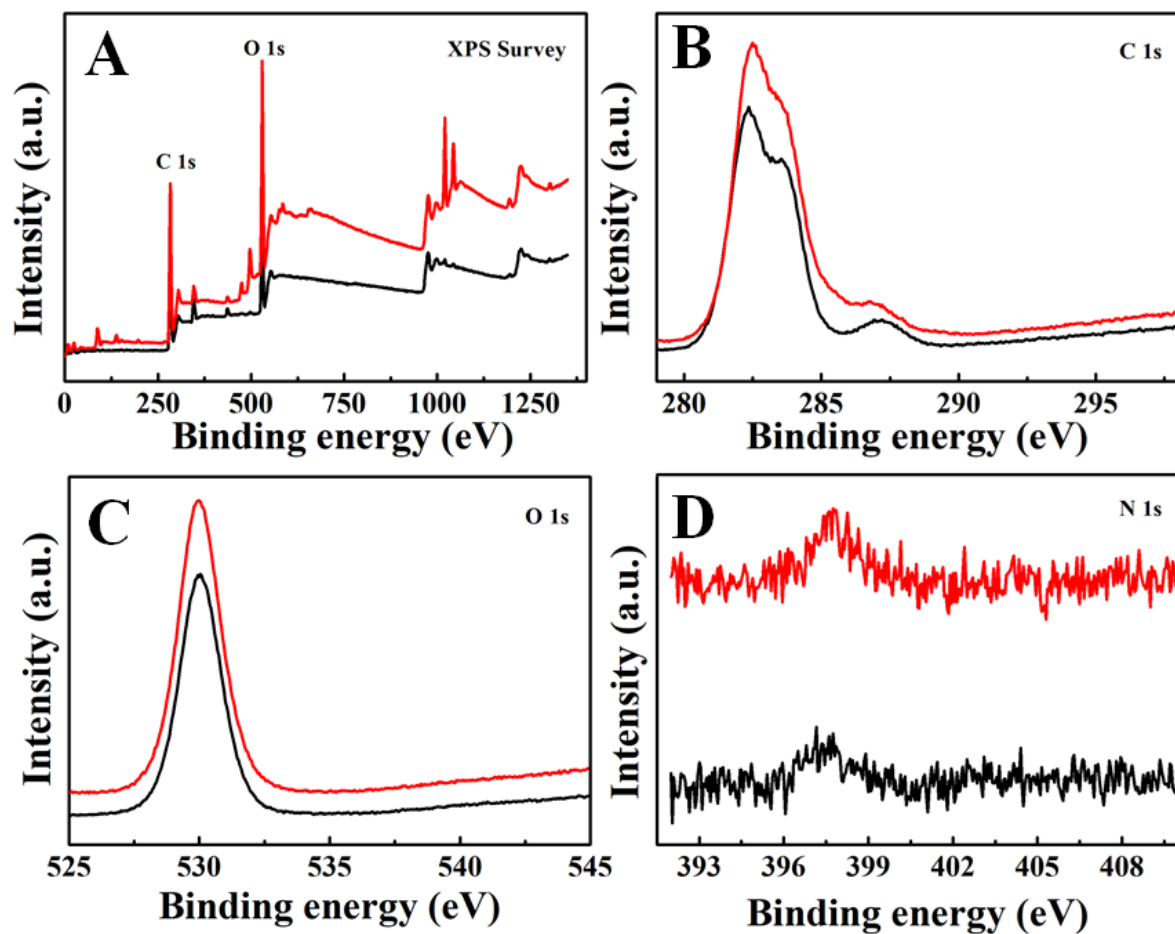

**Figure S7:** XPS spectra of (A) spectral survey, (B) C 1s, (C) O 1s, and (D) N 1s of PVA/BC (black) and PVA/CBC (red) electrodes showing the presence of multifunctional groups.

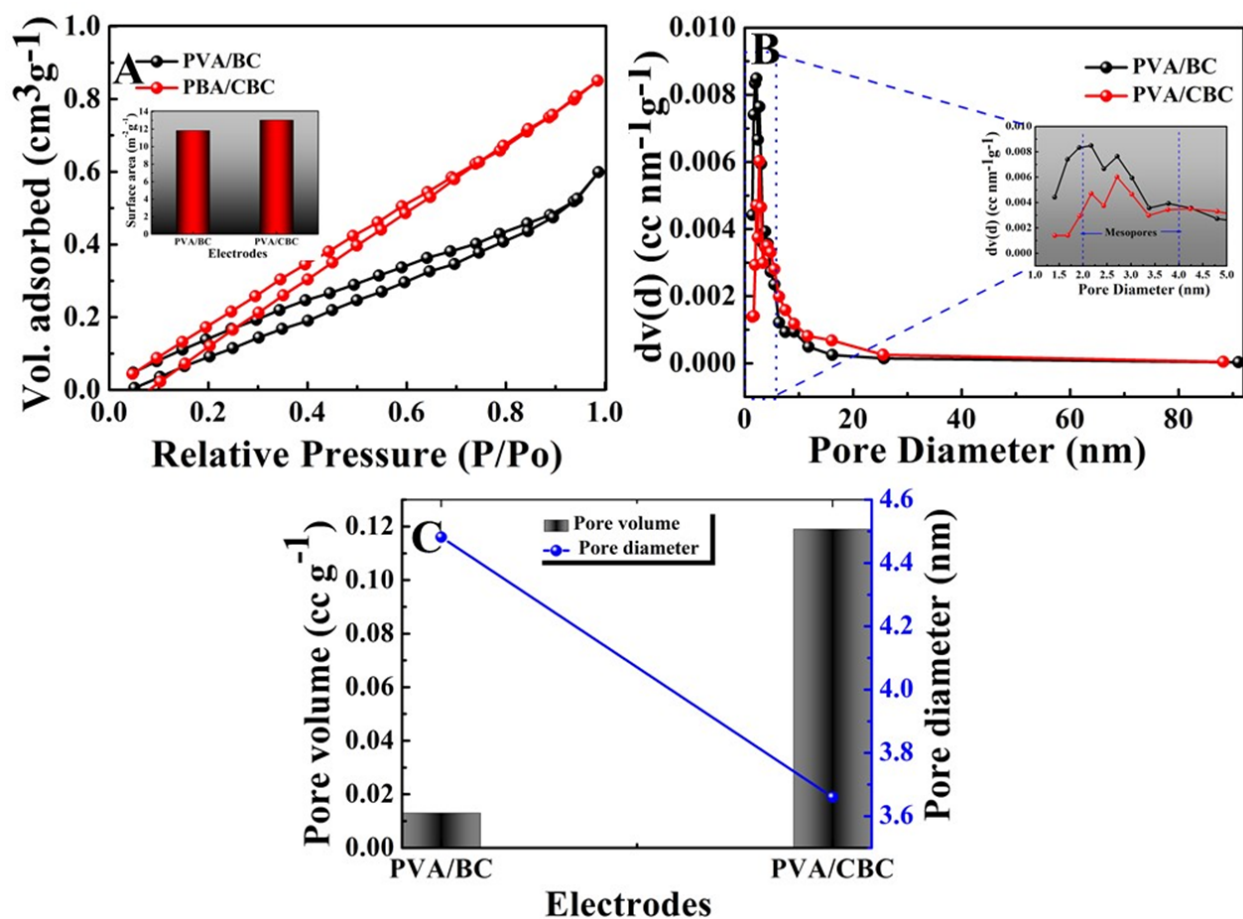

**Figure S8:** (A) N<sub>2</sub> adsorption/desorption isotherms (Inset: Comparison of surface area of PVA/BC and PVA/CBC electrodes), (B) pore size distribution and (C) comparison of pore volume and pore diameter of PVA/BC and PVA/CBC electrodes.

### 3.4. Standardization of reactivation methodology

Biofilm clogging is one of the major constraints that limits the performance of MFC. This could be overcome by reactivation of the anode surface at regular interval to sustain the performance. Researchers have adopted many methodologies including physical, chemical and biological methods for efficient reactivation. The feasibility of these methods for reactivation in current system is also evaluated as per the reported literatures. In the present study, the advantages of shear forces in biofilm have been explored with ultrasonic conjoined bubbling for reactivation. Physical reactivation is done by washing electrode thoroughly by aspirating distilled water to and fro through a micropipette. Sodium hypochlorite being a good surface disinfectant is employed as chemical method. Antimicrobial agent namely ciprofloxacin is used as biological treatment used

for the comparison study and the results are expressed as biofilm removal efficiency in percentage and illustrated in **Table S3**.

**Table S3:** Comparison of efficiency of different reactivation strategies

| Method     | Specifications | Biofilm removal efficacy (%) | Limitation/Advantage                                                         |
|------------|----------------|------------------------------|------------------------------------------------------------------------------|
| Physical   | Washing        | 31.70                        | • Not applicable to in-vivo system                                           |
| Chemical   | 2.5% NaOCl     | 20.38                        | • Hinder the growth of existing bacteria in the anolyte raising overall cost |
|            | 5.0% NaOCl     | 26.36                        |                                                                              |
| Biological | 500µg/ml       | 16.65                        |                                                                              |
|            | 1mg/ml         | 19.64                        | • Applicable to in-vivo system                                               |
| Mechanical | US 5min        | 46.60                        |                                                                              |
|            | US 10min       | 68.23                        | • High removal efficiency                                                    |
|            | B 5 min        | 60.45                        |                                                                              |
|            | B 10 min       | 62.01                        | • No hindrance to bacterial metabolism                                       |
|            | USCB 5min      | 79.70                        |                                                                              |
|            | USCB 10min     | 83.90                        |                                                                              |

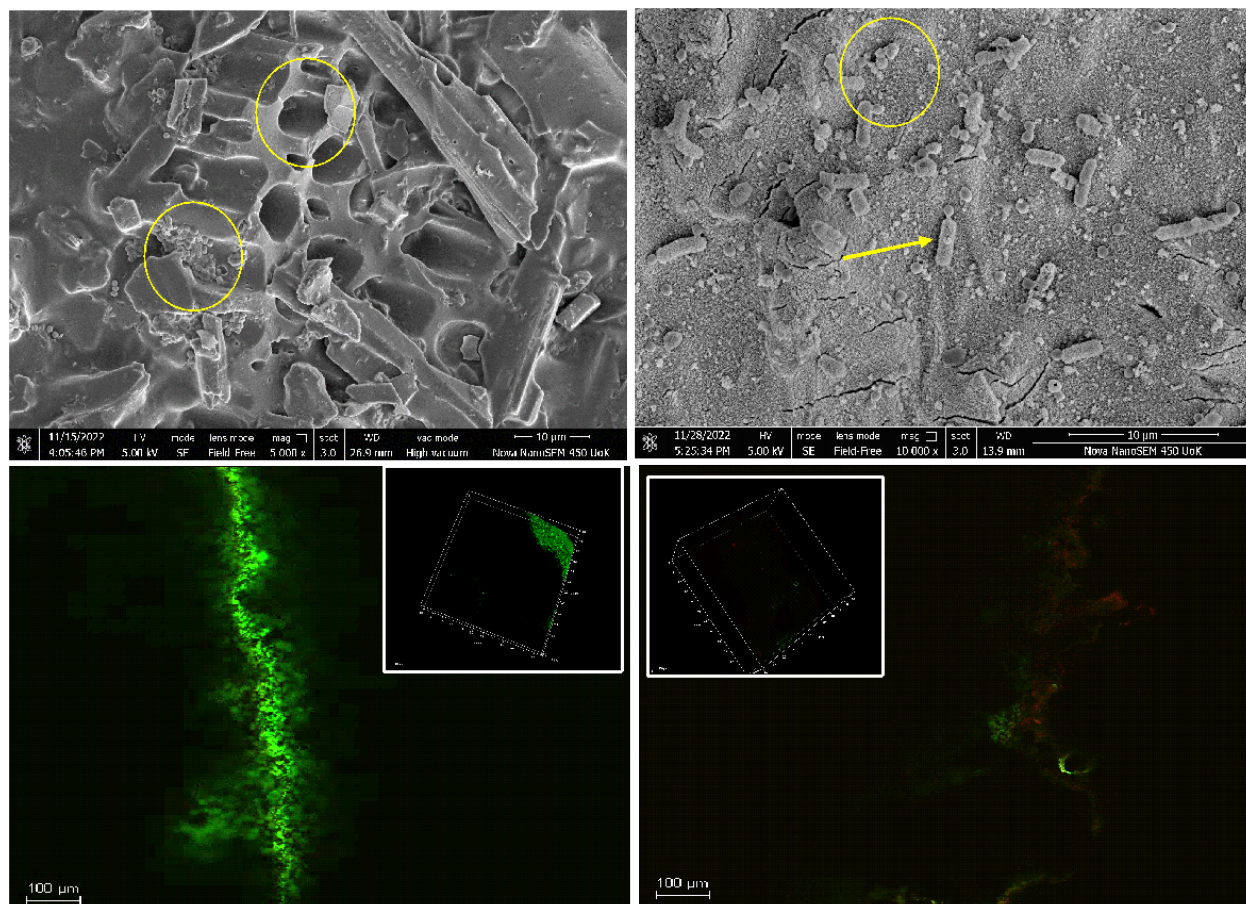

**Figure S9:** (A and B) FESEM images and (C and D) CLSM images (Inset: 3D images) of PVA/BC and PVA/CBC electrodes after reactivation of biochar-based electrodes by ultrasonication coupled bubbling revealing the retention of surface texture with high bacterial removal efficiency.

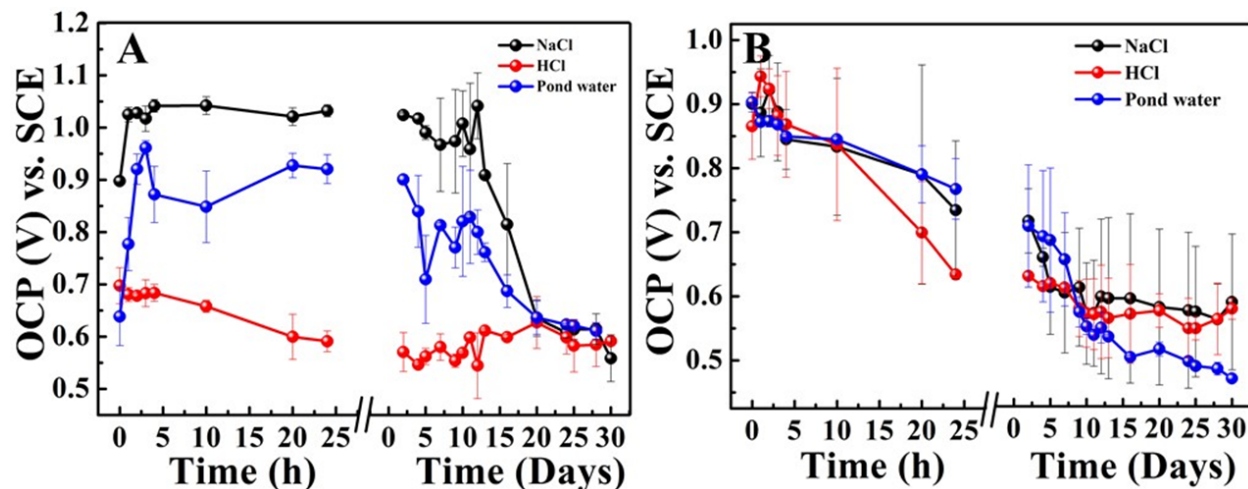

**Figure S10:** OCP curve of (A) PVA/BC and (B) PVA/CBC electrodes immersed in different aggressive environment namely 3.0M NaCl, 1.0 M HCl and pond water for a period of 30 days showing the stability of the coatings.

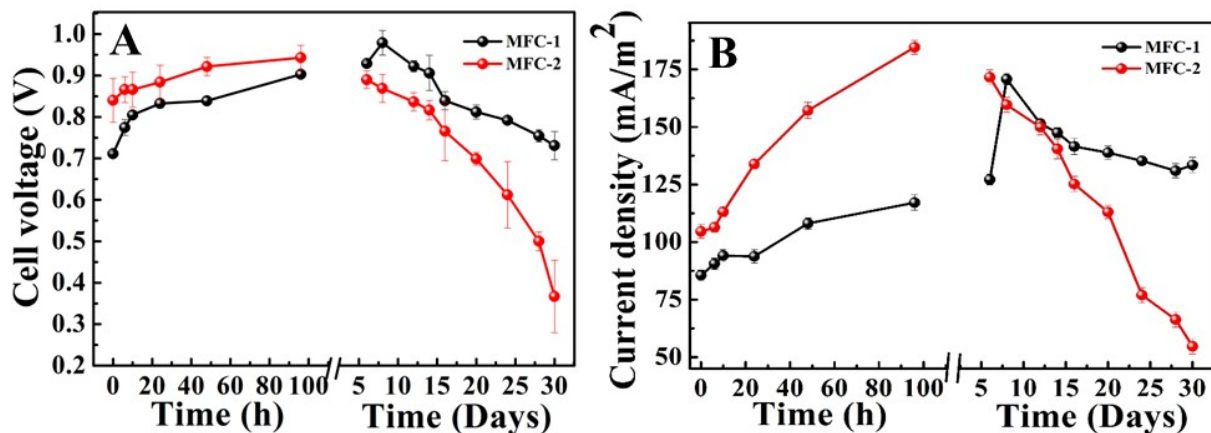

**Figure S11:** (A) Cell voltage and (B) Current density curve of reactivated biochar-based electrodes in MFC systems inoculated with pure culture of *S. putrefaciens* showing the reusability of the developed electrodes. MFC-1 and MFC-2 fabricated with PVA/BC and PVA/CBC-1.0 as bioanode respectively.

**Table S4:** Comparison of different literatures and reactivation strategies

| Type   | Anode             | Performance             |                               | Reactivation strategies            | Sustainability | Ref           |
|--------|-------------------|-------------------------|-------------------------------|------------------------------------|----------------|---------------|
|        |                   | Current density         | Power density                 |                                    |                |               |
| SC-MFC | Graphite felt     | -                       | 105 mW/m <sup>2</sup>         | Replaced by fresh media            | 31 days        | [12]          |
| SC-MFC | Graphite brush    | 7.45 A/m <sup>2</sup>   | 1330 mW m <sup>2</sup>        | Replaced by fresh media            | 15 days        | [13]          |
| DC-MFC | Carbon felt       | -                       | 6.1 W/m <sup>3</sup>          | Moderate shear stress (9.34 mPa)   | 40 days        | [14]          |
| DC-MFC | Carbon Brush      | -                       | 3920 mW/m <sup>3</sup>        | Ultrasonics driven biofilm removal | 6 days         | [15]          |
| DC-MFC | Carbon felt       | 233 mA/m <sup>2</sup>   | 3.1 ± 0.6 W/m <sup>3</sup>    | Replaced by fresh media            | 7 days         | [16]          |
| DC-MFC | Carbon fiber mesh | 4.96 mA/cm <sup>2</sup> | 399.3 ± 7.4 mW/m <sup>2</sup> | Replaced by fresh media            | -              | [17]          |
| DC-MFC | Carbon cloth      | 150mA/m <sup>2</sup>    | 250mW/m <sup>2</sup>          | Replaced by fresh media            | 4-5 days       | [18]          |
| DC-MFC | Biochar           | 253.5mA/m <sup>2</sup>  | 349.9 mW/m <sup>2</sup>       | USCB                               | 15 days        | Present study |

## References for Supporting information

- [1] N. M. Mubarak, J. N. Sahu, E. C. Abdullah and N. S. Jayakumar, *J. Anal. Appl. Pyrolysis*, 2016, **120**, 521–528.
- [2] S. Dawood, T. K. Sen and C. Phan, *Bioresour. Technol.*, 2017, **246**, 76–81
- [3] V. Gargiulo, A. Gomis-Berenguer, P. Giudicianni, C. O. Ania, R. Ragucci and M. Alfe, *Energy & amp; Fuels*, 2018, **32**, 10218–10227.
- [4] M. Abdallah, D. Ni, and A. Simson, *Biomass and Bioenergy*, 2020, **143**, 105883
- [5] S. Huang, Y. Ding, Y. Li, X. Han, B. Xing and S. Wang, *Energy & amp; Fuels*, 2021, **35**, 1557–1566.
- [6] N. Hossain, S. Nizamuddin, G. Griffin, P. Selvakannan, N. M. Mubarak and T. M. I. Mahlia, *Sci. Rep.*, 2020, **10**, 1–15.
- [7] V. K. Ponnusamy, S. Nagappan, R. R. Bhosale, C. H. Lay, D. Duc Nguyen, A. Pugazhendhi, S. W. Chang and G. Kumar, *Bioresour. Technol.*, 2020, **310**, 123414.
- [8] Z. Liu, B. Fei, Z. Jiang and X. Liu, *Bioresour. Technol.*, 2014, **167**, 94–99.
- [9] P. N. Y. Yek, Y. W. Cheng, R. K. Liew, W. A. Wan Mahari, H. C. Ong, W. H. Chen, W. Peng, Y. K. Park, C. Sonne, S. H. Kong, M. Tabatabaei, M. Aghbashlo and S. S. Lam, *Renew. Sustain. Energy Rev.*, 2021, **151**, 111645.
- [10] X. Liu, J. Liao, H. Song, Y. Yang, C. Guan and Z. Zhang, *Sci. Rep.*, 2019, **9(1)**, 1-12.
- [11] H. Zhao, X. Li, L. Zhang and J. Xue, *Sci. Rep*, 2021, **11(1)**, 1-11.
- [12] S. Martinez and M. Di Lorenzo, *Chem. Eng. Sci.*, 2019, **198**, 108-116.
- [13] X. Song, Q. Jiang, J. Liu, Y. Shao, and Y. Feng, *Chem. Eng. Sci.*, 2019, **369**, 652-659.
- [14] M. A. Islam, B. Ehiraj, C. K. Cheng, B. N Dubey and M. M. R. Khan, *J. Electroanal. Chem.* 2019, 844, 14-22.
- [15] M. A. Islam, C. W. Woon, B. Ehiraj, C. K. Cheng, A. Yousuf, and M. M. R. Khan, *Energy Fuels*, 2017, **31(1)**, 968-976.
- [16] J. A. Albarracin- Arias, C. P Yu, T. Maeda, W. V. Quintero, and V. Sanchez-Torres, *Int. J. Hydrog. Energy*, 2021, **46(74)**, 36903-36916.
- [17] J. Jiang, S. Zhang, S. Li, W. Zeng, F. Li, and W. Wang, *Sci. Total Environ.*, 2022, **802**, 149989.
- [18] Y. Y. Yu, H. L. Chen, Y. C. Yong, D. H. Kim and H. Song, *Chem Comm.*, 2011, **47(48)**, 12825-12827.
